# Supplementary material for: The Secondary Organic Aerosol Processor (SOAP v1.0) model: a unified model with different ranges of complexity based on the molecular surrogate approach
Source: Copernicus journal article supplement (doi:10.5194/gmd-8-1111-2015), 2015-04-22
Supplement: Supplementary file 1 [file gmd-8-1111-2015-supplement.pdf]

Supplement of Geosci. Model Dev., 8, 1111–1138, 2015  
<http://www.geosci-model-dev.net/8/1111/2015/>  
doi:10.5194/gmd-8-1111-2015-supplement  
© Author(s) 2015. CC Attribution 3.0 License.

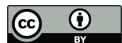

Geoscientific  
Model Development

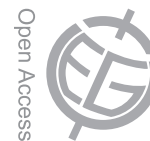

*Supplement of*

## **The Secondary Organic Aerosol Processor (SOAP v1.0) model: a unified model with different ranges of complexity based on the molecular surrogate approach**

**F. Couvidat and K. Sartelet**

*Correspondence to:* F. Couvidat ([florian.couvidat@ineris.fr](mailto:florian.couvidat@ineris.fr))

To parameterize the morphology factors of a particle with a solid core, the diffusion of organic compounds inside an ideal particle of constant diameter is treated explicitly as described in the following section. The evolution of the concentration of organics as a function of time is explicitly computed for different solid volume fraction  $f_s$ . For each  $f_s$ , morphology factors are fitted to reproduce the results of the explicit evolution of organics with the simplified approach presented in this paper. The polynomial parameters were then fitted to represent the evolution of the morphology factors with  $f_s$ .

## 1 Discretization of the diffusion of organics inside a particle with a solid core

The flux  $F$  (in molecules/s) of molecules crossing a surface  $S$  by diffusion is:

$$F = SD_{org}\nabla C \quad (1)$$

By discretizing this equation for a sphere (where concentrations only depend on the radius  $r$  to the center of the particle), the flux of molecules crossing the interface between a layer  $i$  of mean radius  $R_i$  and a layer  $j$  of mean radius  $R_j$  (with  $j=i+1$  or  $j=i-1$ ) is:

$$F_{i,j} = 4\pi r_{i,j}^2 D_{org} \frac{C_j - C_i}{R_j - R_i} \quad (2)$$

where  $r_{i,j}$  is the radius to the center of the particle of the interface between the layers  $i$  and  $j$ .

To solve the diffusion of organic compounds into a particle with a solid core, the organic phase is discretized into  $N_{layer}$  (equal to 100) layers from  $r = R_s$  the radius of the solid core to  $r=R_p$  the radius of the particle. By definition of the volume fraction of the solid core  $f_s$ :

$$R_s = R_p f_s^{1/3} \quad (3)$$

The radius  $r_{i,i+1}$  is computed by:

$$r_{i,i+1} = r_{i-1,i} + (R_p - R_s)/N_{layer} \quad (4)$$

with  $i$  varying from 1 (for the layer at the interface with the solid core) to  $N_{layer}-1$  ( $N_{layer}$  being the index for the layer at the interface with the gas phase) and with  $r_{0,1}$  being the radius of the solid core  $R_s$ .

The radius of the layer  $R_i$  is computed by:

$$R_i = 0.5 (r_{i-1,i} + r_{i,i+1}) \quad (5)$$

The evolution of concentrations inside layers is described by:

$$C_i(t + \Delta t) = C_i(t) + \frac{F_{i,i+1} + F_{i,i-1}}{V_{layer}} \Delta t \quad (6)$$

with  $V_{layer}$  the volume of the layer.

$$V_{layer} = \frac{4}{3}\pi (r_{i,i+1}^3 - r_{i-1,i}^3) \quad (7)$$
